# Supplementary material for: MXene nanoribbons as electrocatalysts for the hydrogen evolution reaction with fast kinetics
Source: Royal Society of Chemistry journal article supplement (doi:10.1039/c8cp02635a), 2018-01-01
Supplement: c8cp02635a1.pdf [file c8cp02635a1.pdf]

## Supporting Information

### **MXene nanoribbon as electrocatalysts for hydrogen evolution reaction with fast kinetics**

Xiaowei Yang, Nan Gao, Si Zhou\*, Jijun Zhao

*Key Laboratory of Materials Modification by Laser, Ion and Electron Beams, Dalian University  
of Technology, Ministry of Education, Dalian 116024, China*

---

\* Corresponding author. Email: sizhou@dlut.edu.cn (S. Zhou)

**Table S1.** Vibrational frequencies and zero-point energies (ZPE) for H\* adsorption on the edges of various O-terminated MXenes nanoribbons. The value of (ZPE –  $TS$ ) for gaseous H<sub>2</sub> at  $T = 298$  K is –0.70 eV per H atom, given by the NIST-JANAF thermodynamics table.<sup>1</sup> Thus, the difference of (ZPE –  $TS$ ) between the adsorbed H\* and gaseous H<sub>2</sub> phases ranges from 0.22 to 0.30 eV per H atom for various MXene nanoribbons.

| nanoribbon                     | Vibrational frequencies (cm <sup>-1</sup> ) |       |      | ZPE (eV) |
|--------------------------------|---------------------------------------------|-------|------|----------|
| Ti <sub>2</sub> C              | 192.3                                       | 77.9  | 36.5 | 0.15     |
| V <sub>2</sub> C               | 214.2                                       | 86.2  | 57.8 | 0.18     |
| (Ti, Nb)C                      | 148.2                                       | 141.2 | 79.6 | 0.18     |
| Nb <sub>2</sub> C              | 152.7                                       | 138.8 | 89.8 | 0.19     |
| Mo <sub>2</sub> C              | 222.7                                       | 152.7 | 89.8 | 0.18     |
| Zr <sub>3</sub> C <sub>2</sub> | 149.6                                       | 121.0 | 67.4 | 0.17     |
| Ti <sub>3</sub> C <sub>2</sub> | 145.4                                       | 125.7 | 77.3 | 0.17     |
| Hf <sub>3</sub> C <sub>2</sub> | 151.1                                       | 129.8 | 77.2 | 0.18     |
| Ti <sub>3</sub> CN             | 150.3                                       | 140.5 | 69.8 | 0.18     |
| Ti <sub>4</sub> N <sub>3</sub> | 140.7                                       | 119.0 | 84.9 | 0.17     |
| Nb <sub>4</sub> C <sub>3</sub> | 146.6                                       | 138.9 | 85.5 | 0.18     |
| Ta <sub>4</sub> C <sub>3</sub> | 150.9                                       | 146.4 | 88.0 | 0.19     |

**Table S2.** Binding energy of H\* species ( $\Delta E_{H^*}$ ) on the top site of C atoms on the ribbon edge and H-C bond length ( $d_{H-C}$ ), free energy of formation for hydrogen adsorption ( $\Delta G_{H^*}$ ) on the hollow site of metal atoms on the ribbon edge and distance between H and metal atoms ( $d_{H-M}$ ), and  $d$  band center relative to Fermi level ( $\varepsilon_d$ ) for various O-terminated MXene nanoribbons with width  $N = 12$ .

| nanoribbon                     | $\Delta E_{H^*}$ (eV) | $d_{H-C}$ (Å) | $\Delta G_{H^*}$ (eV) | $d_{H-M}$ (Å) | $\varepsilon_d$ (eV) |
|--------------------------------|-----------------------|---------------|-----------------------|---------------|----------------------|
| Ti <sub>2</sub> C              | -0.83                 | 1.12          | 0.51                  | 1.75          | -4.47                |
| V <sub>2</sub> C               | -0.48                 | 1.12          | 0.44                  | 1.64          | -4.45                |
| Mo <sub>2</sub> C              | -0.54                 | 1.12          | 0.25                  | 1.72          | -4.74                |
| Nb <sub>4</sub> C <sub>3</sub> | -0.67                 | 1.15          | 0.19                  | 1.84          | -4.37                |
| (Ti, Nb)C                      | -0.93                 | 1.15          | 0.04                  | 1.99          | -5.12                |
| Ti <sub>3</sub> C <sub>2</sub> | -1.11                 | 1.12          | -0.07                 | 1.95          | -4.18                |
| Zr <sub>3</sub> C <sub>2</sub> | -1.08                 | 1.13          | -0.29                 | 2.09          | -4.26                |
| Ti <sub>3</sub> CN             | -0.75                 | 1.12          | -0.44                 | 1.90          | -4.49                |
| Nb <sub>2</sub> C              | -0.37                 | 1.15          | -0.50                 | 2.20          | -4.74                |
| Ti <sub>4</sub> N <sub>3</sub> | 0                     | 1.04          | -0.44                 | 1.94          | -4.89                |
| Ta <sub>4</sub> C <sub>3</sub> | -0.64                 | 1.16          | -0.56                 | 1.97          | -5.36                |
| Hf <sub>3</sub> C <sub>2</sub> | -1.04                 | 1.13          | -0.59                 | 2.06          | -4.69                |

**Table S3.** Free energy of formation for hydrogen adsorption ( $\Delta G_{\text{H}^*}$ ) at different  $\text{H}^*$  coverage ( $\theta$ ) for zigzag nanoribbons of O-terminated  $\text{Ti}_3\text{C}_2$  MXene with width  $N = 12$ .

| $\theta$ | $\Delta G_{\text{H}^*}$ (eV) |
|----------|------------------------------|
| 1/2      | -1.11                        |
| 5/8      | -1.05                        |
| 2/3      | -1.07                        |
| 7/8      | -1.09                        |
| 1        | -1.11                        |

**Table S4.** Free energy of formation for hydrogen adsorption ( $\Delta G_{\text{H}^*}$ ) for O-terminated  $\text{Ti}_3\text{C}_2$  and (Ti, Nb)C MXene nanoribbons with different ribbon width  $N$ .

| $N$ | $\Delta G_{\text{H}^*}$ (eV) |           |
|-----|------------------------------|-----------|
|     | $\text{Ti}_3\text{C}_2$      | (Ti, Nb)C |
| 4   | 0                            | --        |
| 5   | 0.04                         | --        |
| 6   | -0.12                        | --        |
| 7   | 0                            | --        |
| 8   | -0.09                        | 0.02      |
| 9   | 0.01                         | -0.05     |
| 10  | -0.06                        | 0.04      |
| 11  | -0.01                        | 0.05      |
| 12  | -0.07                        | 0.04      |
| 13  | -0.01                        | -0.12     |
| 14  | -0.07                        | 0.04      |
| 15  | -0.02                        | -0.11     |
| 16  | -0.06                        | 0.09      |
| 17  | -0.02                        | 0.03      |

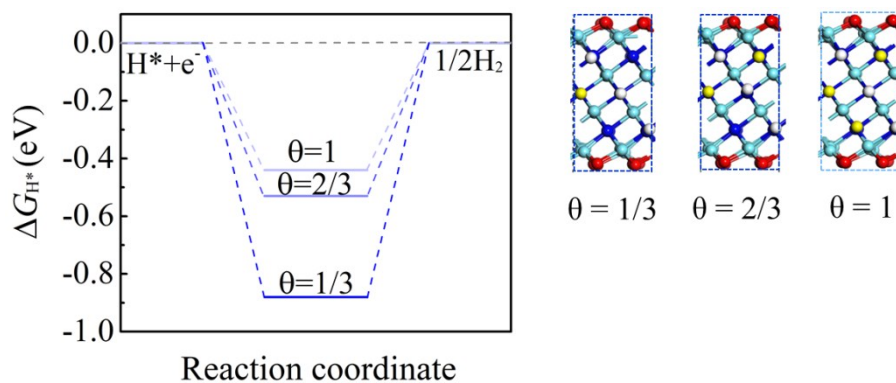

**Fig. S1** Free energy diagrams for hydrogen evolution at zero potential and pH = 0 on the edges of  $Ti_4N_3$  MXene nanoribbons at different  $H^*$  coverage ( $\theta$ ). The black dashed line indicates the ideal  $\Delta G_{H^*}$  for HER catalysis. The structures of ribbon edge with  $H^*$  adsorption is shown on the right panels. The H, O, Ti and N atoms are shown in white (yellow), red, cyan and blue colors, respectively. The H atoms in white and yellow colors are adsorbed on the top site of N atoms and on the hollow site between Ti atoms, respectively. All these adsorption sites exhibit too strong binding strength for HER catalysis.

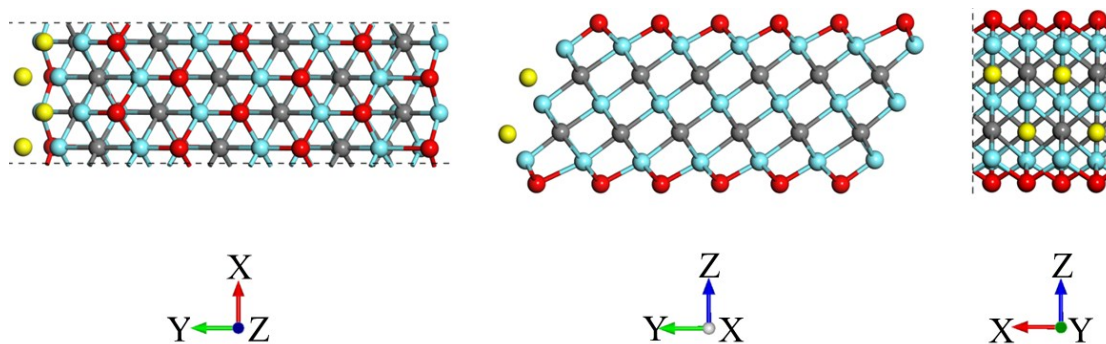

**Fig. S2** Top view (left panel), side view (middle panel) and edge (right panel) of zigzag nanoribbons of O-terminated  $\text{Ti}_3\text{C}_2$  MXene. The C, O and Ti atoms are shown in grey, red and cyan colors, respectively. The yellow balls indicate the adsorbed  $\text{H}^*$  species on the ribbon edge.

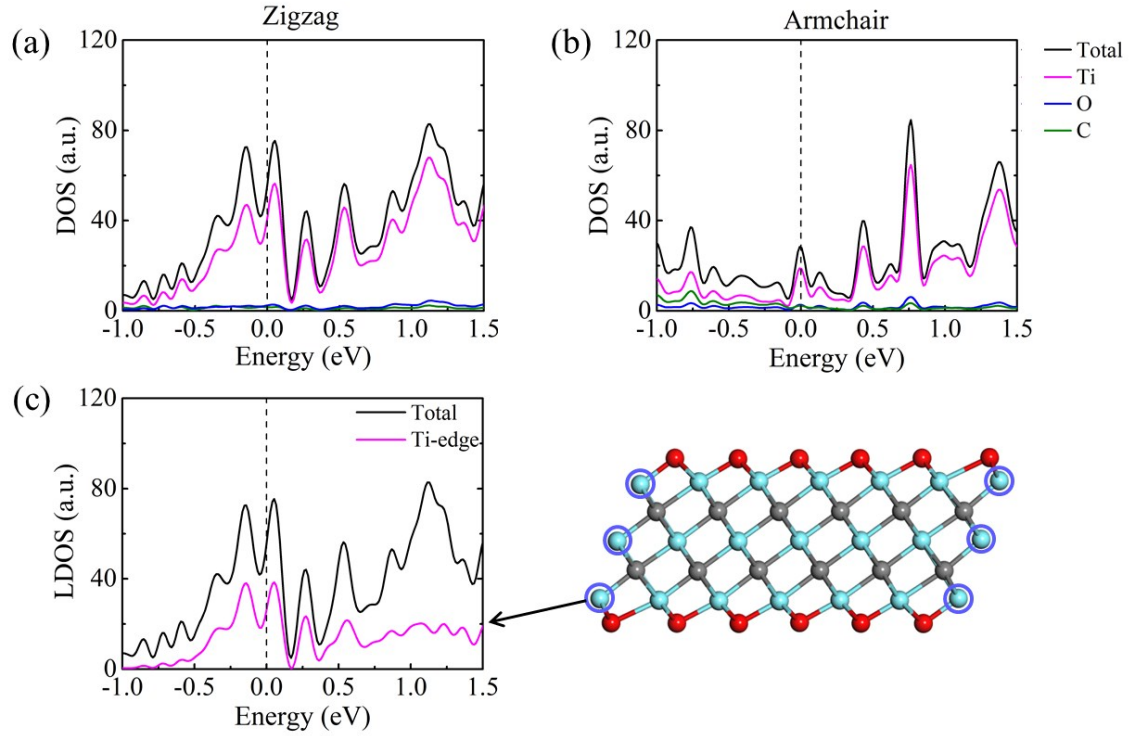

**Fig. S3** Density of states (DOS) of (a) zigzag and (b) armchair nanoribbons of O-terminated  $\text{Ti}_3\text{C}_2$  MXene with width  $N = 12$ . The color lines show the DOS from different atoms. (c) Local DOS from Ti atoms on the edge of zigzag  $\text{Ti}_3\text{C}_2$  nanoribbon (magenta line, the corresponding atomic structure is displayed on the right panel), compared with total DOS (black line). The Fermi level is shifted to zero.



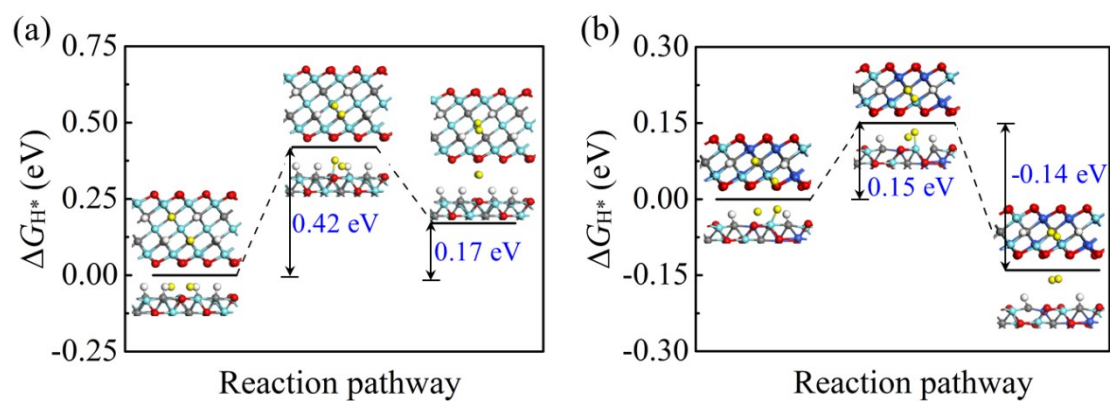

**Fig. S4** Free energy profiles of Tafel reaction for  $\text{H}_2$  formation on the edges of (a)  $\text{Ti}_3\text{C}_2$  and (b)  $(\text{Ti}, \text{Nb})\text{C}$  MXene nanoribbons with width  $N = 13$  and 15, respectively. The top and side views of the ribbon edge are shown (from left to right) for the initial, transition and final states, respectively. The H, C, O, Ti and Nb atoms are shown in white (yellow for the two  $\text{H}^*$  reactants), grey, red, cyan and blue colors, respectively. The blue numbers indicate the energy barrier (left) and Gibbs free energy of formation (right).

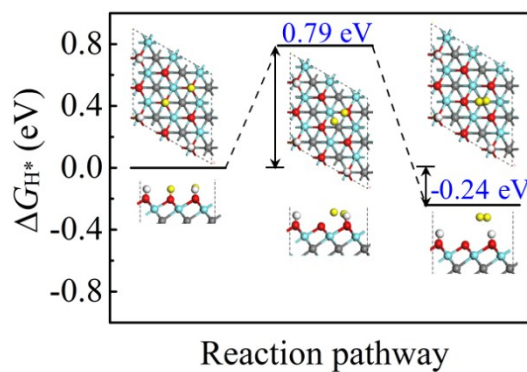

**Fig. S5** Free energy profile of Tafel reaction for H<sub>2</sub> formation on 2D Ti<sub>3</sub>C<sub>2</sub> monolayer with O-terminated surface and at optimal H\* coverage (1/2). The insets (from left to right) show the top and side views of the initial, transition and final states, respectively. The H, C, O, and Ti atoms are shown in white (yellow for the two H\* reactants), grey, red and cyan colors, respectively. The blue numbers indicate the energy barrier (left) and Gibbs free energy of formation (right).

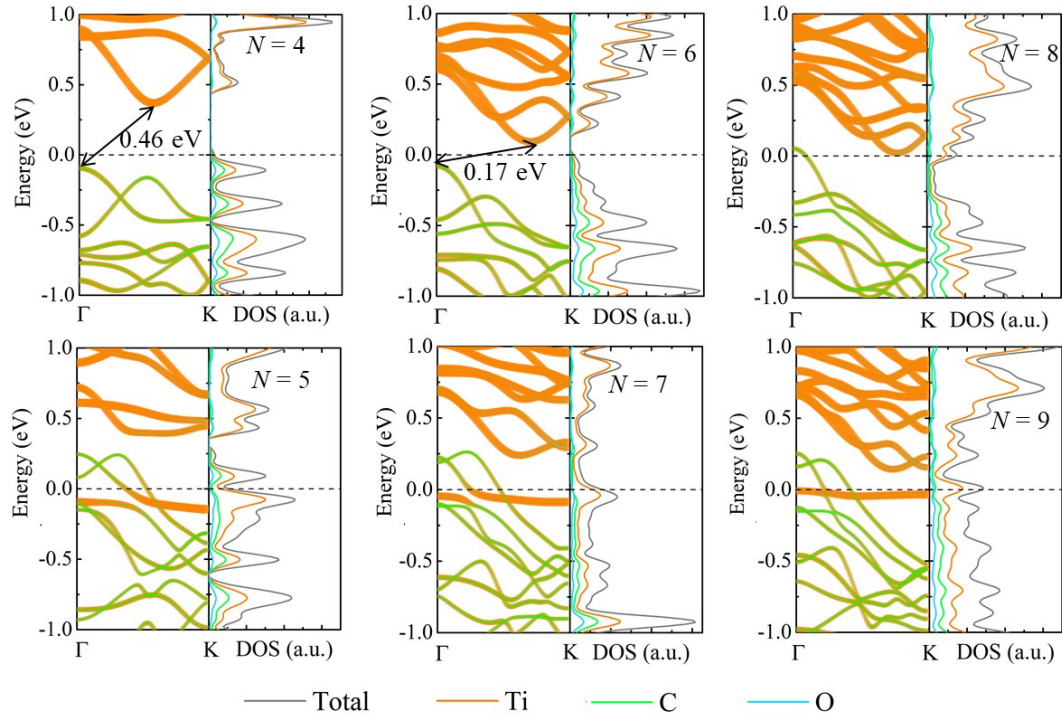

**Fig. S6** Band structures (left panel) and DOS (right panel) of armchair  $\text{Ti}_3\text{C}_2$  MXene nanoribbons with different width  $N = 4\sim 9$ . The color indicates the contribution of the bands or DOS from C, O and Ti atoms, and the line width is proportional to weight. The Fermi energy is set to zero.

## References

- 1 M. W. Chase, *NIST-JANAF Thermochemical Tables*, American Institute of Physics: New York, 1998.
